# Supplementary material
Source: PubMed Central journal article supplement (PMC3706934)
Supplement: NIHMS52273-supplement-Supp_Table_1.pdf [file NIHMS52273-supplement-Supp_Table_1.pdf]

**Supplementary Table 1: Statistically significant chromosomal alterations in *Rassf1A*; *Apc*<sup>+/*Min*</sup> adenomas.** Array CGH was performed to analyse DNA copy number changes (gains and losses, 'indels') in the adenomas of *Rassf1A*<sup>+/+</sup>; *Apc*<sup>+/*Min*</sup> (n=3) and *Rassf1A*<sup>-/-</sup>; *Apc*<sup>+/*Min*</sup> (n=9) mice (adenoma samples analysed were of moderate-severe histological grade of dysplasia, contained ≤20% normal tissue and had a low presence of infiltrating inflammatory cells). Array-CGH analysis was performed by fluorochrome-reversed pairs of two-colour hybridizations of a tiling path mouse BAC microarray with fluorescently labelled adenoma DNA and normal DNA, using a method described previously [Chung et al., 2004]. Overlapping or adjacent BACs in the tiling path were merged to form segments using GLAD [Hupe et al., 2004] and statistical significance (LimmaP value <0.03) was calculated by comparing the signal ratios using LIMMA/Bioconductor [Smyth, 2005]. 'Indel' refers to a significantly amplified or deleted segment.

| Indel                                                                              | Chr. | Aberration | Start BAC   | End BAC     | Start position (bp) | Region (kbp) | Log2 ratio (range) |
|------------------------------------------------------------------------------------|------|------------|-------------|-------------|---------------------|--------------|--------------------|
| <b>Adenoma 1 (<i>Rassf1A</i><sup>+/+</sup>; <i>Apc</i><sup>+/<i>Min</i></sup>)</b> |      |            |             |             |                     |              |                    |
| 1                                                                                  | 1    | Loss       | RP23-102K10 | RP23-393I20 | 152879854           | 224          | -0.259 / -0.332    |
| 2                                                                                  | 5    | Loss       | RP23-159G12 | RP24-288A1  | 76624982            | 512          | -0.351 / -0.580    |
| 3                                                                                  | 5    | Loss       | RP24-370J14 | RP23-299D9  | 94397167            | 1558         | -0.173 / -0.642    |
| 4                                                                                  | 6    | Gain       | RP23-296B6  | RP23-329P9  | 51756081            | 486          | +0.421 / +0.625    |
| 5                                                                                  | 9    | Gain       | RP23-315J10 | RP24-136G21 | 123711616           | 229          | +0.345 / +0.366    |
| 6                                                                                  | 12   | Gain       | RP24-121E15 | RP24-76I22  | 115953449           | 471          | +0.300 / +0.579    |
| 7                                                                                  | 14   | Gain       | RP24-192I1  | RP23-78D19  | 3000001             | 3454         | +0.271 / +0.924    |
| 8                                                                                  | X    | Loss       | RP23-105O4  | RP23-373M10 | 131553060           | 304          | -0.250 / -0.386    |
| <b>Adenoma 2 (<i>Rassf1A</i><sup>+/+</sup>; <i>Apc</i><sup>+/<i>Min</i></sup>)</b> |      |            |             |             |                     |              |                    |
| 1                                                                                  | 4    | Loss       | RP23-286N14 | RP23-145B5  | 21091871            | 718          | -0.363 / -0.390    |
| 2                                                                                  | 4    | Loss       | RP23-285K4  | RP23-411B7  | 41898266            | 1146         | -0.544 / -0.737    |
| 3                                                                                  | 4    | Loss       | RP23-269E13 | RP23-200O20 | 111452440           | 1947         | -0.373 / -1.331    |
| 4                                                                                  | 4    | Loss       | RP23-350D7  | RP23-132K17 | 121089250           | 1080         | -0.239 / -0.738    |
| 5                                                                                  | 5    | Loss       | RP23-239L21 | RP23-438G9  | 14818107            | 471          | -0.688 / -0.880    |
| 6                                                                                  | 7    | Loss       | RP23-342N5  | RP23-123H4  | 19298186            | 3494         | -0.401 / -0.784    |
| 7                                                                                  | 7    | Loss       | RP23-466F9  | RP24-347J6  | 31024602            | 2229         | -0.560 / -1.302    |
| 8                                                                                  | 7    | Loss       | RP23-379I14 | RP24-104I11 | 104136169           | 215          | -0.352 / -0.390    |
| 9                                                                                  | 10   | Loss       | RP24-325B7  | RP24-290I13 | 81004872            | 294          | -0.453 / -0.518    |
| 10                                                                                 | 16   | Loss       | RP24-140N16 | RP23-238B16 | 36160827            | 178          | -0.287 / -0.313    |
| 11                                                                                 | 17   | Gain       | RP23-364A24 | RP23-480C16 | 30146798            | 553          | +0.557 / +0.654    |
| <b>Adenoma 3 (<i>Rassf1A</i><sup>+/+</sup>; <i>Apc</i><sup>+/<i>Min</i></sup>)</b> |      |            |             |             |                     |              |                    |
| 1                                                                                  | 1    | Loss       | RP23-102K10 | RP23-393I20 | 152879854           | 224          | -0.259 / -0.332    |
| 2                                                                                  | 5    | Loss       | RP23-159G12 | RP24-288A1  | 76624982            | 512          | -0.351 / -0.580    |
| 3                                                                                  | 5    | Loss       | RP24-370J14 | RP23-299D9  | 94397167            | 1558         | -0.173 / -1.195    |
| 4                                                                                  | 6    | Gain       | RP23-296B6  | RP23-329P9  | 51756081            | 486          | +0.396 / +0.625    |
| 5                                                                                  | 9    | Gain       | RP23-315J10 | RP24-136G21 | 123711616           | 229          | +0.345 / +0.366    |
| 6                                                                                  | 11   | Gain       | RP24-331H6  | RP23-452E21 | 38513340            | 265          | +0.430 / +0.641    |
| 7                                                                                  | 12   | Gain       | RP24-121E15 | RP24-76I22  | 115953449           | 471          | +0.300 / +0.579    |
| 8                                                                                  | 14   | Gain       | RP24-192I1  | RP23-78D19  | 3000001             | 3454         | +0.333 / +0.924    |
| 9                                                                                  | X    | Loss       | RP23-105O4  | RP23-373M10 | 131553060           | 304          | -0.250 / -0.386    |
| <b>Adenoma 4 (<i>Rassf1A</i><sup>-/-</sup>; <i>Apc</i><sup>+/<i>Min</i></sup>)</b> |      |            |             |             |                     |              |                    |
| 1                                                                                  | 4    | Gain       | RP23-285K4  | RP23-411B7  | 41898266            | 1146         | +0.415 / +0.520    |
| 2                                                                                  | 5    | Loss       | RP23-159G12 | RP24-288A1  | 76624982            | 512          | -0.209 / -0.506    |
| 3                                                                                  | 5    | Loss       | RP24-370J14 | RP23-299D9  | 94397167            | 1558         | -0.383 / -0.589    |
| 4                                                                                  | 6    | Gain       | RP23-296B6  | RP23-329P9  | 51756081            | 486          | +0.410 / +0.623    |
| 5                                                                                  | 9    | Loss       | RP23-465E17 | RP23-93E19  | 107150756           | 427          | -0.271 / -0.378    |
| 6                                                                                  | 12   | Gain       | RP24-376H17 | RP24-76I22  | 116196448           | 228          | +0.463 / +0.589    |
| 7                                                                                  | 14   | Gain       | RP24-192I1  | RP24-532L14 | 3000001             | 3672         | +0.256 / +0.884    |
| <b>Adenoma 5 (<i>Rassf1A</i><sup>-/-</sup>; <i>Apc</i><sup>+/<i>Min</i></sup>)</b> |      |            |             |             |                     |              |                    |
| 1                                                                                  | 14   | Gain       | RP24-192I1  | RP23-78D19  | 3000001             | 3454         | +0.103 / +0.488    |
| 2                                                                                  | 17   | Loss       | RP23-213F10 | RP24-168J3  | 12838167            | 282          | -0.295 / -0.347    |
| <b>Adenoma 6 (<i>Rassf1A</i><sup>-/-</sup>; <i>Apc</i><sup>+/<i>Min</i></sup>)</b> |      |            |             |             |                     |              |                    |
| 1                                                                                  | 14   | Gain       | RP24-192I1  | RP23-78D19  | 3000001             | 3454         | +0.161 / +0.378    |
| 2                                                                                  | 17   | Loss       | RP23-213F10 | RP24-168J3  | 12838167            | 282          | -0.296 / -0.323    |

**Adenoma 7 (*Rassf1A*<sup>-/-</sup>; *Apc*<sup>+Min</sup>)**

|    |    |      |             |             |           |      |                 |
|----|----|------|-------------|-------------|-----------|------|-----------------|
| 1  | 4  | Loss | RP23-196N14 | RP23-145B5  | 20554242  | 1256 | -0.278 / -0.716 |
| 2  | 4  | Loss | RP23-167I12 | RP23-411B7  | 41832111  | 1212 | -0.477 / -0.871 |
| 3  | 4  | Loss | RP23-350D7  | RP23-290P16 | 121089250 | 770  | -0.314 / -0.446 |
| 4  | 5  | Loss | RP23-239L21 | RP23-438G9  | 14818107  | 471  | -0.369 / -0.493 |
| 5  | 7  | Gain | RP24-487D5  | RP24-562E3  | 8703067   | 322  | +0.392 / +0.335 |
| 6  | 7  | Loss | RP24-352A16 | RP23-464J8  | 16435863  | 331  | -0.291 / -0.354 |
| 7  | 7  | Loss | RP23-153P2  | RP23-123H4  | 19084806  | 3707 | -0.263 / -0.663 |
| 8  | 7  | Loss | RP23-466F9  | RP24-542I6  | 31024602  | 2017 | -0.213 / -0.419 |
| 9  | 7  | Loss | RP23-379I14 | RP24-104I11 | 104136169 | 215  | -0.348 / -0.349 |
| 10 | 9  | Gain | RP23-312L20 | RP23-86N15  | 46583828  | 396  | +0.493 / +0.889 |
| 11 | 9  | Loss | RP23-465E17 | RP23-456B9  | 107150756 | 149  | -0.310 / -0.347 |
| 12 | 9  | Loss | RP23-197K11 | RP23-451B4  | 115006580 | 595  | -0.220 / -0.405 |
| 13 | 9  | Gain | RP23-315J10 | RP24-136G21 | 123711616 | 229  | +0.451 / +0.588 |
| 14 | 12 | Gain | RP23-218B2  | RP24-76I22  | 115896815 | 527  | +0.263 / +0.687 |
| 15 | 17 | Loss | RP23-213F10 | RP24-168J3  | 12838167  | 282  | -0.532 / -0.645 |
| 16 | 17 | Loss | RP24-263O10 | RP24-321P20 | 59213211  | 384  | -0.440 / -1.570 |
| 17 | 18 | Gain | RP23-426G16 | RP23-232N14 | 9742449   | 391  | +0.356 / +0.502 |

**Adenoma 8 (*Rassf1A*<sup>-/-</sup>; *Apc*<sup>+Min</sup>)**

|   |    |      |             |             |           |     |                 |
|---|----|------|-------------|-------------|-----------|-----|-----------------|
| 1 | 9  | Gain | RP23-312L20 | RP23-235J18 | 46583828  | 485 | +0.259 / +0.405 |
| 2 | 9  | Gain | RP23-315J10 | RP24-136G21 | 123711616 | 229 | +0.280 / +0.330 |
| 3 | 12 | Gain | RP24-121E15 | RP24-76I22  | 115953449 | 471 | +0.331 / +0.512 |
| 4 | 17 | Gain | RP23-456P8  | RP23-103I10 | 6020648   | 654 | +0.333 / +0.609 |
| 5 | 17 | Loss | RP23-213F10 | RP24-168J3  | 12838167  | 282 | -0.475 / -0.495 |

**Adenoma 9 (*Rassf1A*<sup>-/-</sup>; *Apc*<sup>+Min</sup>)**

|   |    |      |             |             |           |      |                 |
|---|----|------|-------------|-------------|-----------|------|-----------------|
| 1 | 4  | Gain | RP23-167I12 | RP23-411B7  | 41832111  | 1212 | +0.433 / +0.685 |
| 2 | 5  | Loss | RP23-159G12 | RP24-288A1  | 76624982  | 512  | -0.877 / -1.421 |
| 3 | 5  | Loss | RP24-352H15 | RP24-370J14 | 94337985  | 1618 | -0.617 / -1.656 |
| 4 | 6  | Gain | RP23-424B15 | RP24-87H5   | 130593647 | 521  | +0.322 / +0.437 |
| 5 | 17 | Loss | RP23-213F10 | RP24-168J3  | 12838167  | 282  | -0.343 / -0.455 |

**Adenoma 10 (*Rassf1A*<sup>-/-</sup>; *Apc*<sup>+Min</sup>)**

|    |    |      |             |             |           |      |                 |
|----|----|------|-------------|-------------|-----------|------|-----------------|
| 1  | 4  | Gain | RP23-285K4  | RP23-411B7  | 76624982  | 1146 | +0.383 / +0.591 |
| 2  | 5  | Loss | RP23-159G12 | RP24-288A1  | 76624982  | 512  | -0.245 / -0.599 |
| 3  | 5  | Loss | RP24-370J14 | RP23-299D9  | 94397167  | 1558 | -0.424 / -0.634 |
| 4  | 6  | Gain | RP23-296B6  | RP23-329P9  | 51756081  | 486  | +0.452 / +0.599 |
| 5  | 7  | Loss | RP23-342N5  | RP23-123H4  | 19298186  | 3494 | -0.327 / -0.635 |
| 6  | 9  | Gain | RP23-312L20 | RP23-235J18 | 46583828  | 485  | +0.256 / +0.629 |
| 7  | 9  | Gain | RP23-315J10 | RP24-136G21 | 123711616 | 229  | +0.189 / +0.210 |
| 8  | 12 | Loss | RP23-122J17 | RP23-349L22 | 104049300 | 473  | -0.363 / -0.456 |
| 9  | 12 | Gain | RP24-275L15 | RP23-333D9  | 113909699 | 402  | +0.204 / +0.472 |
| 10 | 12 | Gain | RP23-18L19  | RP24-430M1  | 114852316 | 389  | +0.178 / +0.338 |
| 11 | 12 | Gain | RP23-218B2  | RP24-76I22  | 115896815 | 527  | +0.352 / +0.858 |
| 12 | 13 | Gain | RP23-135A24 | RP23-374O23 | 27651458  | 461  | +0.284 / +0.368 |
| 13 | 13 | Gain | RP23-229D10 | RP24-94N16  | 65300201  | 2023 | +0.225 / +0.500 |
| 14 | 17 | Loss | RP23-213F10 | RP24-168J3  | 12838167  | 282  | -0.410 / -0.500 |

**Adenoma 11 (*Rassf1A*<sup>-/-</sup>; *Apc*<sup>+Min</sup>)**

|   |    |      |             |             |          |      |                 |
|---|----|------|-------------|-------------|----------|------|-----------------|
| 1 | 4  | Gain | RP23-285K4  | RP23-411B7  | 41898266 | 1146 | +0.235 / +0.340 |
| 2 | 6  | Gain | RP23-296B6  | RP23-329P9  | 51756081 | 486  | +0.317 / +0.464 |
| 3 | 18 | Loss | RP24-141F1  | RP24-483G17 | 23216262 | 2223 | -0.239 / -0.399 |
| 4 | 18 | Loss | RP24-129H18 | RP24-114C6  | 25578202 | 1002 | -0.232 / -0.509 |
| 5 | 18 | Loss | RP24-228J4  | RP23-101L2  | 31943444 | 3968 | -0.180 / -0.402 |
| 6 | 18 | Loss | RP24-88N19  | RP23-51A20  | 36042312 | 627  | -0.306 / -0.480 |
| 7 | 18 | Loss | RP23-19K11  | RP24-313G11 | 37895710 | 1863 | -0.115 / -0.483 |
| 8 | 18 | Loss | RP23-69K14  | RP23-166K13 | 41855956 | 540  | -0.126 / -0.360 |
| 9 | 18 | Loss | RP23-392G14 | RP23-408H14 | 46052519 | 1821 | -0.225 / -0.334 |

**Adenoma 12 (*Rassf1A*<sup>-/-</sup>; *Apc*<sup>+Min</sup>)**

|   |    |      |             |             |           |     |                 |
|---|----|------|-------------|-------------|-----------|-----|-----------------|
| 1 | 6  | Gain | RP23-296B6  | RP23-329P9  | 51756081  | 486 | +0.471 / +0.703 |
| 2 | 6  | Loss | RP24-495F22 | RP23-278A22 | 127848336 | 288 | -0.289 / -0.304 |
| 3 | 17 | Loss | RP23-213F10 | RP24-168J3  | 12838167  | 282 | -0.364 / -0.428 |
